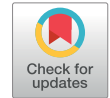

# Erratum

**Erratum. The Relationship Between CGM-Derived Metrics, A1C, and Risk of Hypoglycemia in Older Adults With Type 1 Diabetes. Diabetes Care 2020;43:2349–2354**

<https://doi.org/10.2337/dc21-er01b>

*Elena Toschi, Christine Slyne, Kayla Sifre, Rachel O'Donnell, Jordan Greenberg, Astrid Atakov-Castillo, Sam Carl, and Medha Munshi*

The formula for the calculation of the glucose management indicator (GMI) was incorrect as written in the above-referenced article. The sentence “GMI percentage was calculated as  $(3.31 + 0.02392) \times \text{mean glucose in mg/dL}$ ” is changed to read as follows:

“GMI percentage was calculated as  $3.31 + (0.02392 \times \text{mean glucose in mg/dL})$ .”

The authors apologize for this error. The online version of the article (<https://doi.org/10.2337/dc20-0016>) has been corrected.
